# Supplementary material for: Inappropriate Expression of PD-1 and CTLA-4 Checkpoints in Myeloma Patients Is More Pronounced at Diagnosis: Implications for Time to Progression and Response to Therapeutic Checkpoint Inhibitors
Source: MDPI journal article supplement (doi:10.3390/ijms24065730), 2023-03-17
Supplement: s1 [file s1]

**Table S1.** Patient clinical and laboratory characteristics.

| Parameters                               | Newly Diagnosed (NDMM) | Relapsed/Refractory (RRMM) | Total       |
|------------------------------------------|------------------------|----------------------------|-------------|
| Number of patients, n (%)                | 26 (65%)               | 14 (35%)                   | 40 (100%)   |
| Age of patients, years<br>median (range) | 66 (50-76)             | 72 (65-75)                 | 69 (59-76)  |
| Gender, n (%)                            |                        |                            |             |
| Female                                   | 17 (65.38%)            | 4 (28.57%)                 | 21 (52.5%)  |
| Male                                     | 9 (34.62%)             | 10 (71.43%)                | 19 (47.5%)  |
| ISS stage at diagnosis, n (%)            |                        |                            |             |
| I                                        | 5 (19.23%)             | 1 (7.14%)                  | 6 (15.00%)  |
| II                                       | 10 (38.46%)            | 6 (42.86%)                 | 16 (40.00%) |
| III                                      | 11 (42.31%)            | 7 (50.00%)                 | 18 (45.00%) |
| Type of myeloma, n (%)                   |                        |                            |             |
| IgG                                      | 18 (69.23%)            | 9 (64.28%)                 | 27 (67.50%) |
| IgA                                      | 3 (11.54%)             | 3 (21.43%)                 | 6 (15.00%)  |
| Light chain disease                      | 5 (19.23%)             | 2 (14.29%)                 | 7 (17.50%)  |
| Type of Ig light chain (serum), n (%)    |                        |                            |             |
| Kappa                                    | 16 (61.54%)            | 7 (50.00%)                 | 23 (57.50%) |
| Lambda                                   | 9 (34.62%)             | 7 (50.00%)                 | 16 (40.00%) |
| Unknown                                  | 1 (3.84%)              | 0 (0.00%)                  | 1 (2.50%)   |
| Osteolytic bone lesion/s, n (%)          |                        |                            |             |
| Present                                  | 15 (57.69%)            | 13 (92.86%)                | 28 (70.00%) |
| Absent                                   | 11 (42.31%)            | 1 (7.14%)                  | 12 (30.00%) |
| Morphological indicators, n (%)          |                        |                            |             |
| Hemoglobin $\leq$ 12 g/dL                | 23 (88.47%)            | 8 (57.14%)                 | 31 (77.50%) |
| Platelets $<$ 100,000/mm <sup>3</sup>    | 2 (7.69%)              | 1 (7.14%)                  | 3 (7.50%)   |
| Biochemical indicators, n (%)            |                        |                            |             |
| $\beta$ -2 microglobulin $\geq$ 3.5 mg/L | 18 (69.23%)            | 9 (64.29%)                 | 27 (67.50%) |
| Creatinine $\geq$ 2.0 mg/dL              | 9 (34.62%)             | 4 (28.57%)                 | 13 (32.50%) |
| LDH $>$ 190 U/L                          | 6 (23.08%)             | 2 (14.29%)                 | 8 (20.00%)  |
| Serum calcium $\geq$ 10 mg/dL            | 9 (34.62%)             | 11 (78.57%)                | 20 (50.00%) |
| Prior treatment, n (%)                   |                        |                            |             |
| 1-3 therapy lines                        | 0 (0%)                 | 8 (57.14%)                 | 8 (20.00%)  |
| $\geq$ 4 therapy lines                   | 0 (0%)                 | 6 (42.86%)                 | 6 (15.00%)  |
| BTZ based therapy                        | 0 (0%)                 | 12 (85.71%)                | 12 (30.00%) |
| IMiD therapy                             | 0 (0%)                 | 11 (78.57%)                | 11 (27.50%) |
| No therapy                               | 26 (100%)              | 0 (0%)                     | 26 (65.00%) |

Abbreviations: BTZ, bortezomib; LDH, lactate dehydrogenases; ISS, International Staging System; IMiD, immunomodulatory drug.

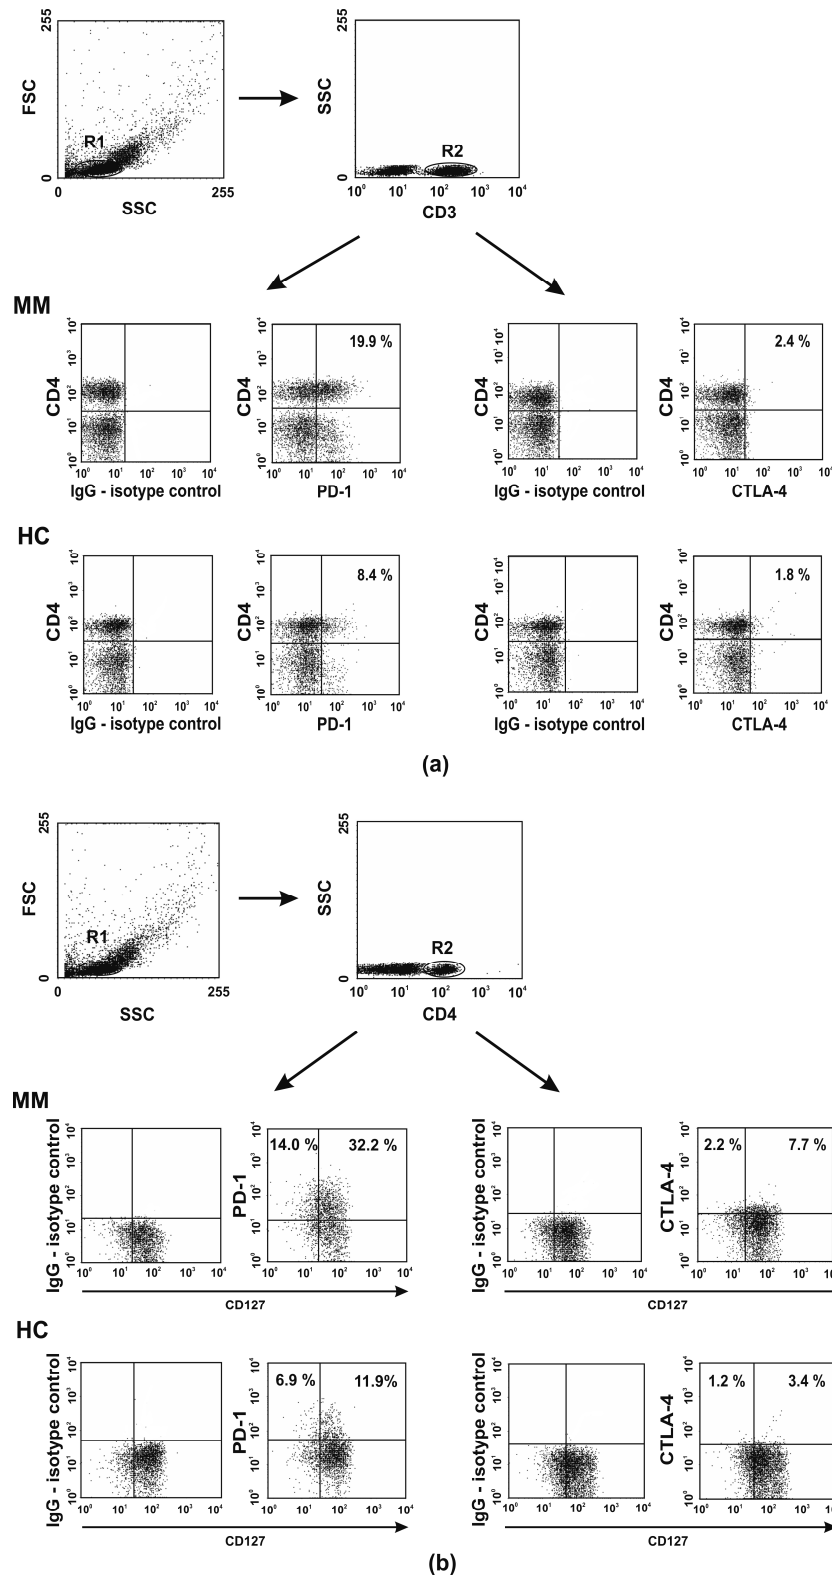

**Figure S1.** Representative dot plots from MM patient and healthy control (HC). Dot plots demonstrate the gating strategy for assessing the proportion of CD4<sup>+</sup> T cells (CD3<sup>+</sup>CD4<sup>+</sup>), Treg (CD4<sup>+</sup>CD127<sup>-</sup>) and Teff (CD4<sup>+</sup>CD127<sup>+</sup>) cells co-expressing PD-1 or CTLA-4 protein. **(a)** Dot plots show the method for analyzing PD-1 or CTLA-4 positive CD4<sup>+</sup> T cells. Lymphocytes were gated (R1) based on their FSC/SSC properties, and then T cells were identified on the SSC/CD3 profile (R2). The R2 gated events were next analyzed for CD4 and PD-1 or CTLA-4 staining. Numbers on dot plots show the percentage of PD-1 or CTLA-4 positive CD4<sup>+</sup> T cells. **(b)** Dot plots show the method for analyzing PD-1 or CTLA-4 positive Treg and Teff cells. The R1 gated lymphocytes were subsequent gated on SSC/CD4 (R2) to identify CD4<sup>+</sup> cells. The R2 gated populations were then analyzed for CD127 and PD-1 or CTLA-4 staining. Numbers on dot plots show the percentage of PD-1 or CTLA-4 positive Treg and Teff cells.
